# Supplementary material for: X-Ray Crystal Structures and Organogelator Properties of (R)-9-Hydroxystearic Acid
Source: Molecules. 2019 Aug 6;24(15):2854. doi: 10.3390/molecules24152854 (PMC6695734; doi:10.3390/molecules24152854)
Supplement: Supplementary file 1 [file molecules-24-02854-s001.pdf]

## Supplementary Material

# X-Ray Crystal Structures and Organogelator Properties of (R)-9-Hydroxystearic Acid

Fioretta Asaro<sup>1,\*</sup>, Carla Boga<sup>2</sup>, Nicola Demitri<sup>3</sup>, Rita De Zorzi<sup>1</sup>, Sara Drioli<sup>1</sup>, Lara Gigli<sup>3</sup>, Gabriele Micheletti<sup>2</sup>, Patrizia Nitti<sup>1,\*</sup>, and Ennio Zangrando<sup>1</sup>

<sup>1</sup> Department of Chemical and Pharmaceutical Sciences, University of Trieste, via L. Giorgieri 1, 34127 Trieste, Italy; [fasaro@units.it](mailto:fasaro@units.it) (F.A.), [rdezorzi@units.it](mailto:rdezorzi@units.it) (R.D.Z.), [sdrioli@units.it](mailto:sdrioli@units.it) (S.D.), [pnitti@units.it](mailto:pnitti@units.it) (P.N.), [ezangrando@units.it](mailto:ezangrando@units.it) (E.Z.)

<sup>2</sup> Department of Industrial Chemistry "Toso Montanari", University of Bologna, viale del Risorgimento 4, 40136 Bologna, Italy; [carla.boga@unibo.it](mailto:carla.boga@unibo.it) (C.B.), [gabriele.micheletti3@unibo.it](mailto:gabriele.micheletti3@unibo.it) (G.M.)

<sup>3</sup> Elettra – Sincrotrone Trieste, S.S. 14 Km 163.5 in Area Science Park, 34149 Basovizza, Trieste, Italy; [nicola.demitri@elettra.eu](mailto:nicola.demitri@elettra.eu) (N.D.), [lara.gigli@elettra.eu](mailto:lara.gigli@elettra.eu) (L.G.)

## Index

|       |            |                                                                                                                                                       |
|-------|------------|-------------------------------------------------------------------------------------------------------------------------------------------------------|
| p. S3 | Figure S1  | DSC curves for ( <i>R</i> )-9-HSA                                                                                                                     |
| p. S3 | Figure S2  | Picture of 1 % w/w gel samples in paraffin oil                                                                                                        |
| p. S4 | Figure S3  | UV-visible absorption spectrum of paraffin oil                                                                                                        |
| p. S4 | Figure S4  | CD spectra of 0.5 % w/w gels in paraffin oil, for ( <i>R</i> )-9-HSA and ( <i>R</i> )-12-HSA                                                          |
| p. S5 | Figure S5  | CD spectra from a freshly prepared 0.5 % w/w ( <i>R</i> )-9-HSA paraffin oil gel                                                                      |
| p. S5 | Figure S6  | CD spectra for 1.0 % w/w ( <i>R</i> )-12-HSA gels in cyclohexane and <i>n</i> -hexane                                                                 |
| p. S6 | Figure S7  | CD spectra for the gel of ( <i>R</i> )-12-HSA at 0.5 % w/w in paraffin oil from a 1 cm and a 2 mm quartz cell                                         |
| p. S6 | Figure S8  | XRD pattern for ( <i>R</i> )-9-HSA at 110 K calculated from the single crystal X-ray diffraction data                                                 |
| p. S7 | Figure S9  | XRD patterns of ( <i>R</i> )-9-HSA samples crystallized in CH <sub>3</sub> OH, CH <sub>3</sub> CN, and CCl <sub>4</sub>                               |
| p. S7 | Figure S10 | XRD patterns for ( <i>R</i> )-9-HSA solid from aged paraffin oil gel and the solid obtained after recrystallization from melt                         |
| p. S8 | Figure S11 | Molecular packing in the crystal structure of ( <i>R</i> )-9-HSA after melting and recrystallization                                                  |
| p. S8 | Table S1   | Refined unit cell parameters for ( <i>R</i> )-9-HSA                                                                                                   |
| p. S9 | Table S2   | Temperature-dependent changes in torsion angles (°) of the carboxylic groups with respect to the alkyl chains                                         |
| p. S9 | Table S3   | Temperature-dependent changes in hydrogen bond lengths in the structures of ( <i>R</i> )-9-HSA crystallized from methanol, determined at 100 K and RT |
| p. S9 | Table S4   | Geometrical parameters of H-bonds in the structure of ( <i>R</i> )-12-HSA methyl ester.                                                               |
| p. S9 | Table S5   | Torsion angles (°) indicating the conformation of the carboxylic group with respect to the alkyl chain for ( <i>R</i> )-12-HSA methyl ester.          |

## Differential Scanning Calorimetry

DSC measurements were performed by a Q2000 (TA instruments, US), with a temperature ramp of 5 °C/min during both heating and cooling, on a sample of 4.6 mg of (*R*)-9-HSA crystallized from methanol.

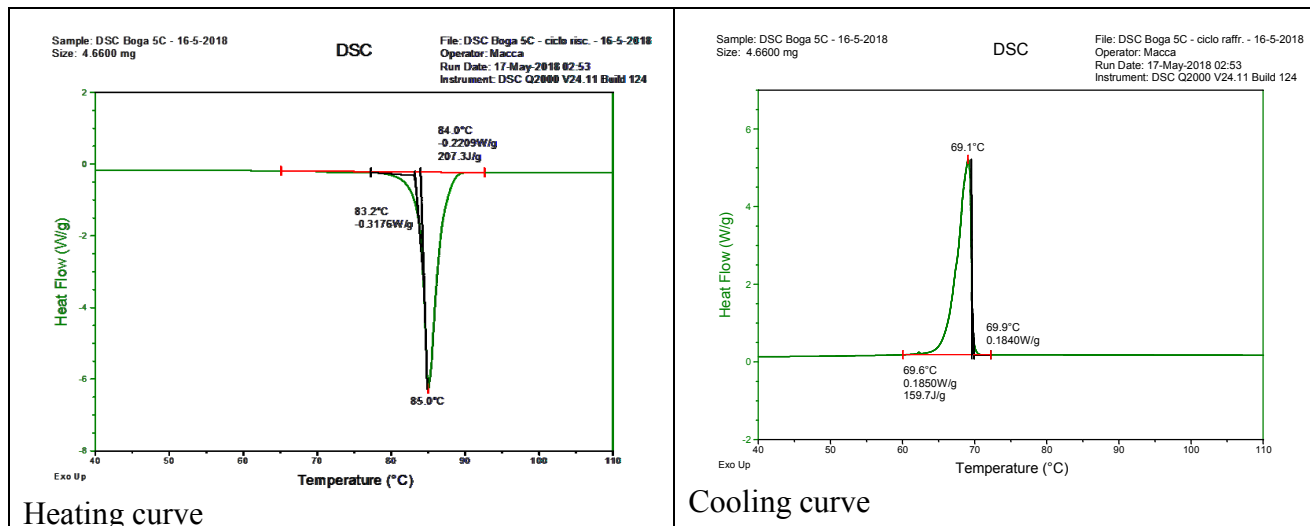

**Figure S1.** DSC curves for (*R*)-9-HSA.

On heating:  $\Delta H_M = 207$  J/g,  $T_{\text{onset } M} = 83.2$  °C and  $T_M$  peak at 85.0 °C.

On cooling:  $\Delta H_{Cr} = 160$  J/g,  $T_{\text{onset } Cr} = 69.9$  °C and  $T_{Cr}$  peak at 69.1 °C.

## (*R*)-9- and (*R*)-12-HSA Organogels

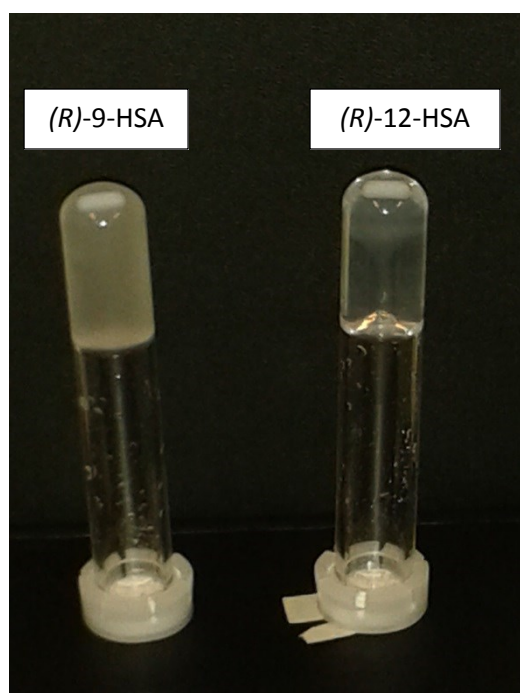

**Figure S2.** 1 % w/w gel samples in paraffin oil prepared by microwave irradiation. In each sample there is a small magnetic stirrer bar.

## Uv-visible absorption

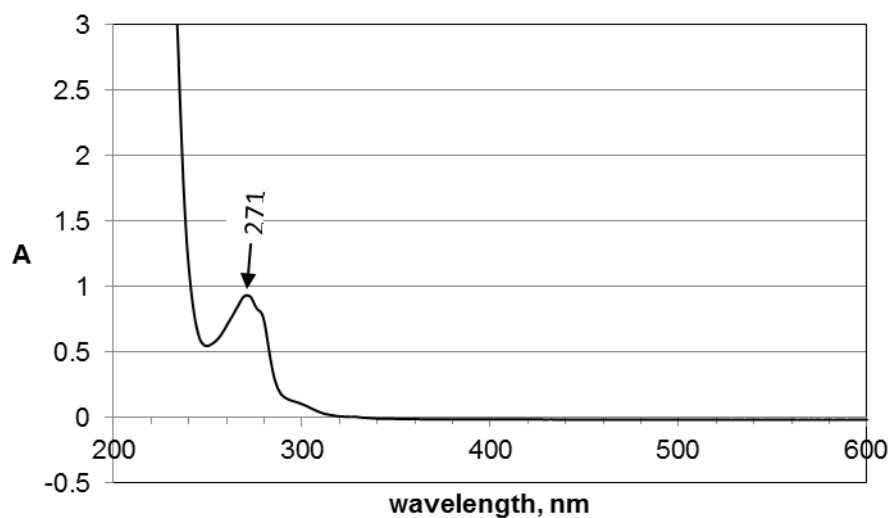

**Figure S3.** UV-visible absorption spectrum of paraffin oil recorded by a Shimadzu UV-2450 spectrophotometer.

## Circular Dichroism Spectra

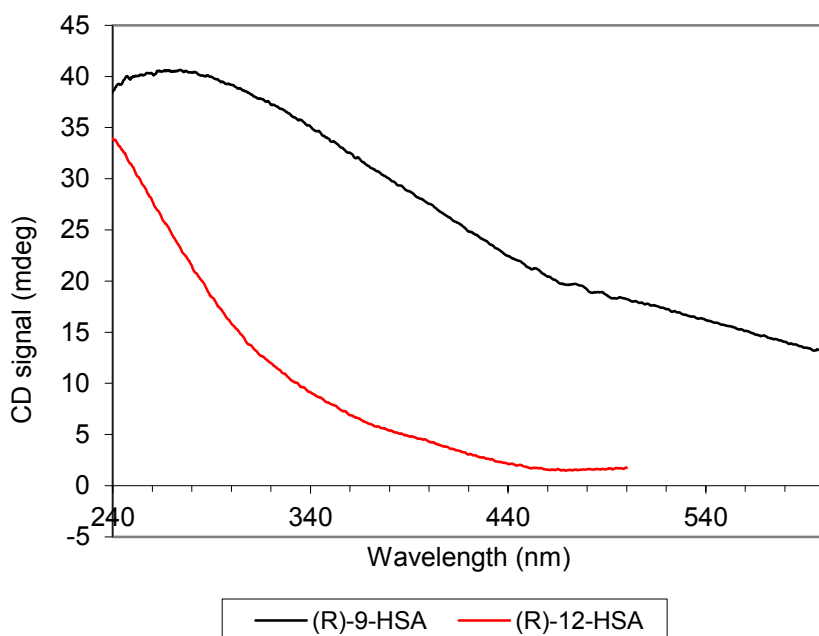

**Figure S4.** Comparison of the CD spectra of 0.5 % w/w gels in paraffin oil, for (R)-9-HSA (black) and (R)-12-HSA (red). The layers were obtained by casting 0.2742 g, for the former, and 0.2297 g, for the latter, of a hot solution on one of the optical faces inside a 1 cm quartz cuvette.

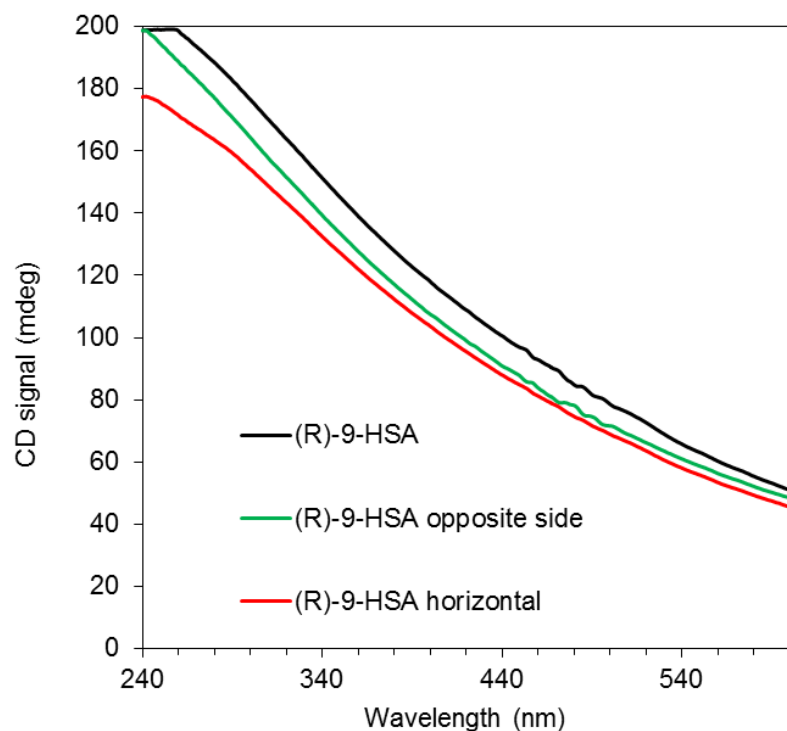

**Figure S5.** CD spectra from a freshly prepared 0.5 % w/w (*R*)-9-HSA paraffin oil gel sample in a 1 mm optical path quartz cell, on rotating the cell both vertically (front: black and back: green) and by 90 ° (red) to check eventual linear dichroism effects.

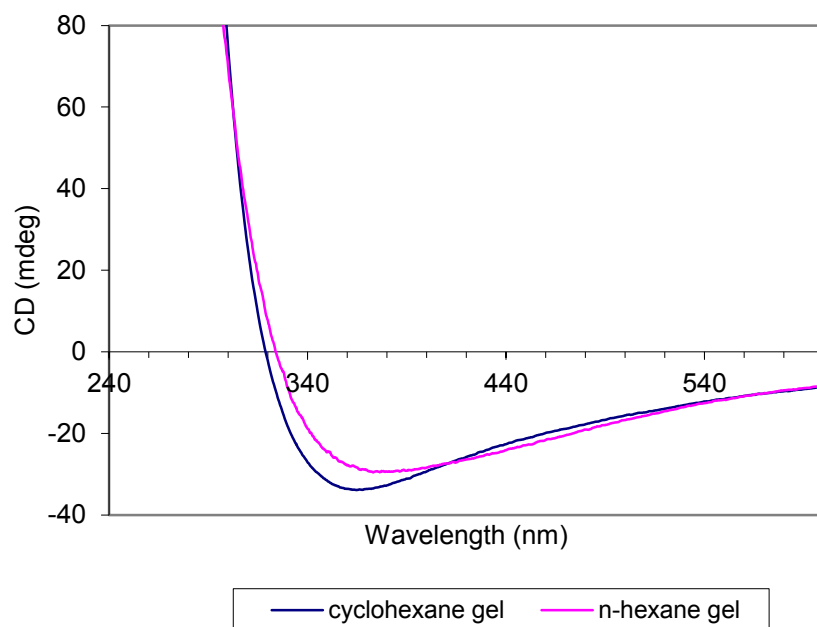

**Figure S6.** CD spectra for 1.0 % w/w (*R*)-12-HSA gels in cyclohexane (blue) and *n*-hexane (pink)

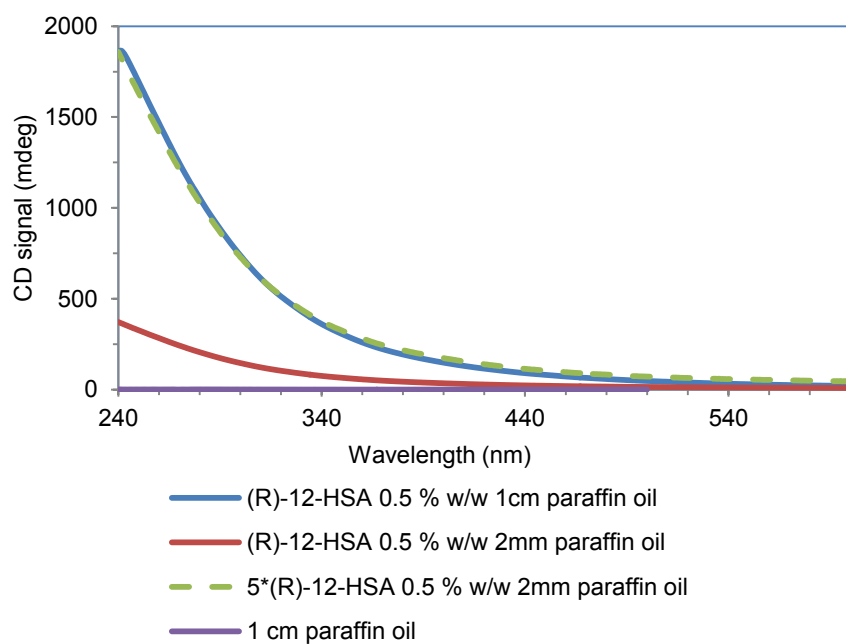

**Figure S7.** CD spectra for the gel of (*R*)-12-HSA at 0.5 % w/w in paraffin oil from a 1 cm quartz cell (blue), a 2 mm quartz cell (red), the latter trace multiplied by 5 (green dashed), paraffin oil (violet)

The CD spectra recorded from cells of different optical length show that the quartz surface does not affect the CD signal.

### XRD Pattern of the (*R*)-9-HSA Crystal

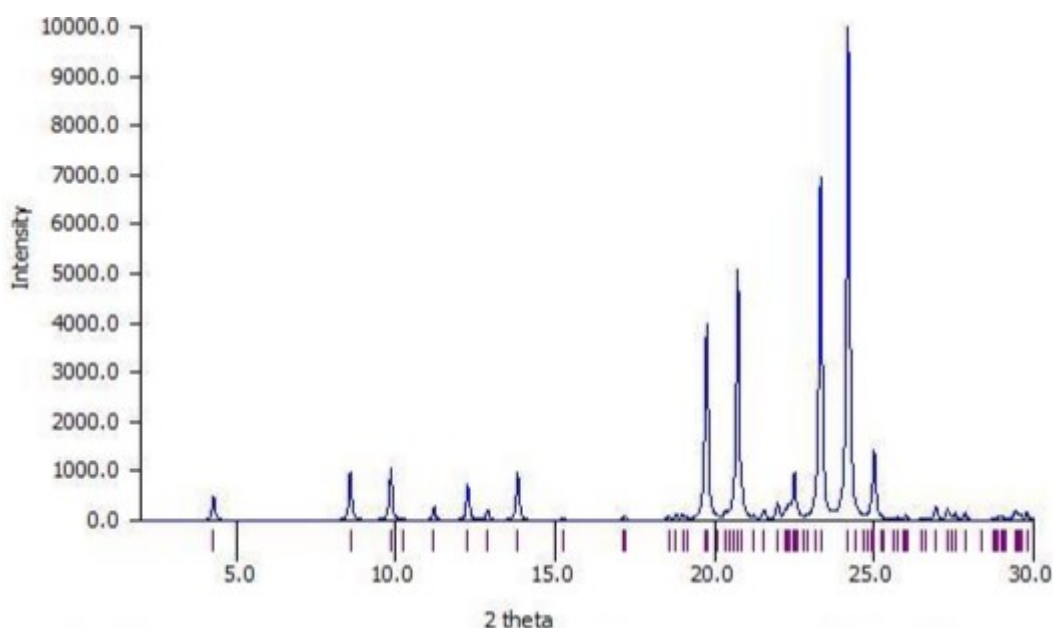

**Figure S8.** XRD pattern for (*R*)-9-HSA at 110 K calculated from the single crystal X-ray diffraction data for the Cu K $\alpha$  radiation wavelength (1.5418 Å)

## Experimental XRD Patterns

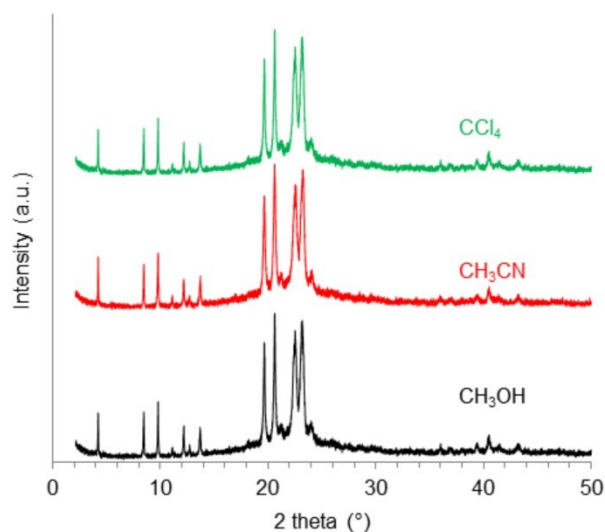

**Figure S9.** XRD patterns of three (*R*)-9-HSA samples crystallized in CH<sub>3</sub>OH, CH<sub>3</sub>CN, and CCl<sub>4</sub>, respectively.

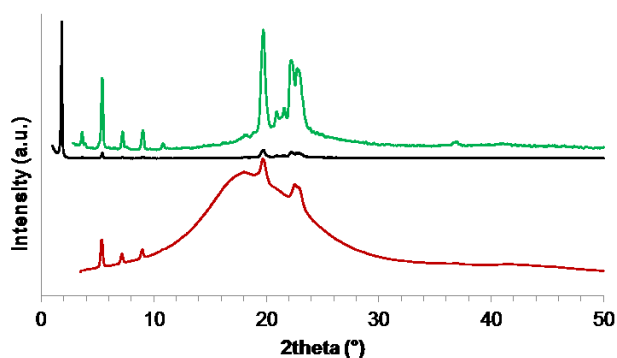

**Figure S10.** XRD patterns for (*R*)-9-HSA solid from aged paraffin oil gel (bottom trace dark red) and the solid obtained after recrystallization from melt (upper trace, black line, with the 5x magnification of the 2.8-50 ° region, in green).

The peaks at lowest angles, in particular the one at 1.9° 2θ, are not visible in the lowest pattern because to improve the signal to noise ratio of the sample obtained from the paraffin, it was collected at 0.7 Å at the XRD1 beamline of Elettra synchrotron characterized by a high flux and the presence of a Pilatus 2M with a very low noise read-out detector. The experimental condition allowed us to obtain a good pattern but at the same time the beam stopper masked peaks below 3° of 2θ.

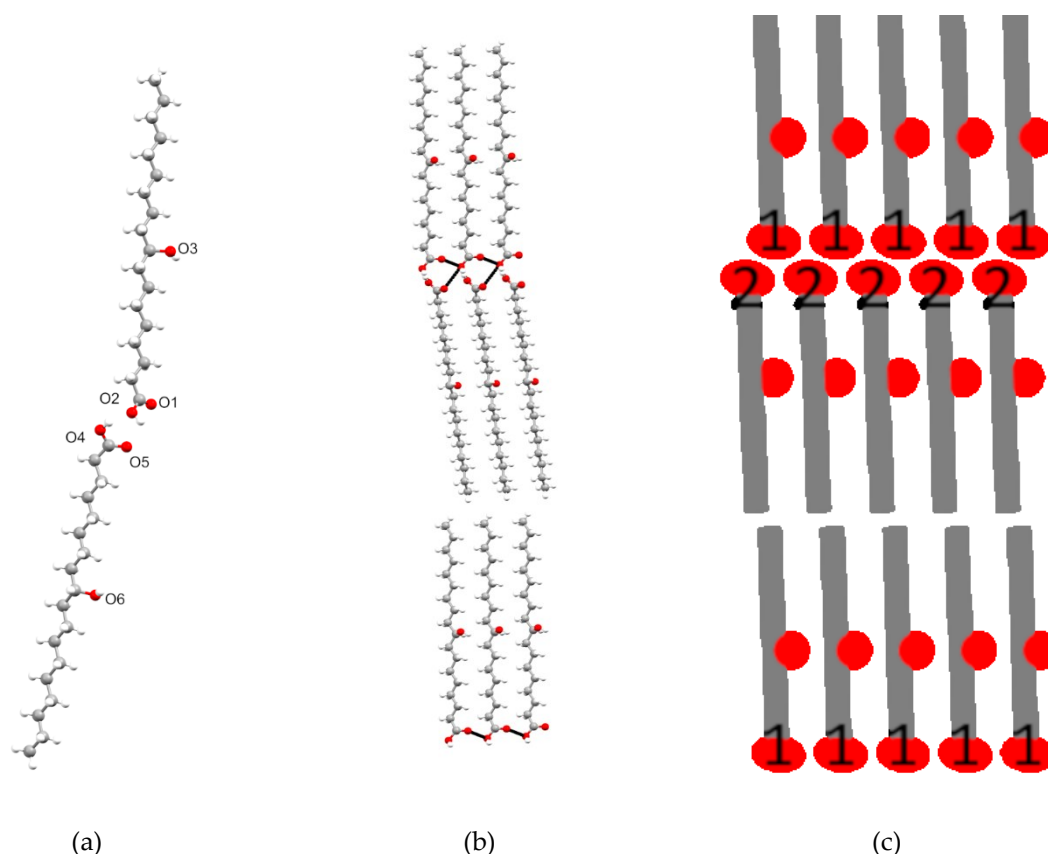

**Figure S11.** (a) The crystallographic independent unit in the crystal structure of *(R)*-9-HSA after melting and recrystallization: the *(R)*-9-HSA dimer, with molecule **1** above and molecule **2** below. (b) Layers of *(R)*-9-HSA molecules in the crystal packing, as viewed along the *b* crystallographic direction. (c) Schematic representation of the layer arrangement of molecules of *(R)*-9-HSA, in the same direction as (b). Heads are depicted as red ovals, tails as grey rectangles, and hydroxyl groups as red circles. Numbers highlight that layers are formed by the repetition of a single crystallographically independent molecule (**1** or **2**).

### X-Rays Crystal Structure Parameters for *(R)*-9-Hydroxystearic Acid

**Table S1.** Refined unit cell parameters for *(R)*-9-HSA crystallized from CH<sub>3</sub>OH, CH<sub>3</sub>CN, and CCl<sub>4</sub>, and comparison with the unit cell parameters of the single crystals obtained from methanol.

|                                            | 100 K <sup>1</sup> | rT <sup>1</sup> | CH <sub>3</sub> OH | CH <sub>3</sub> CN | CCl <sub>4</sub> |
|--------------------------------------------|--------------------|-----------------|--------------------|--------------------|------------------|
| S.G.                                       | <i>P1</i>          | <i>P1</i>       | <i>P1</i>          | <i>P1</i>          | <i>P1</i>        |
| <i>a</i> (Å)                               | 4.832(1)           | 4.9300(15)      | 4.926(2)           | 4.982(4)           | 4.982(4)         |
| <i>b</i>                                   | 9.139(1)           | 9.2106(25)      | 9.210(2)           | 9.217(4)           | 9.217(4)         |
| <i>c</i>                                   | 20.737(3)          | 21.089(4)       | 21.084(4)          | 21.158(8)          | 21.158(8)        |
| $\alpha$ (°)                               | 83.156(8)          | 83.62(5)        | 83.62(1)           | 83.54(1)           | 83.54(2)         |
| $\beta$                                    | 89.865(8)          | 92.20(6)        | 92.20(9)           | 91.93(9)           | 91.93(9)         |
| $\gamma$                                   | 82.130(9)          | 82.38(5)        | 82.38(19)          | 82.86(1)           | 82.86(1)         |
| <i>V</i> (Å <sup>3</sup> )                 | 900.6(11)          | 941.9(3)        | 941.9(1)           | 956.3(1)           | 956.3(1)         |
| <i>d</i> (g/cm <sup>3</sup> ) <sup>2</sup> | 1.108              | 1.059           | 1.059              | 1.044              | 1.044            |

<sup>1</sup> Single crystal from methanol. <sup>2</sup> Calculated density.

**Table S2.** Temperature-dependent changes in torsion angles (°) of the carboxylic groups with respect to the alkyl chains.

|                 | 100 K       | RT          |
|-----------------|-------------|-------------|
| Molecule 1      |             |             |
| O1-C1-C2-C3     | -19.19(17)  | -21.0(3)    |
| O2-C1-C2-C3     | 162.00(10)  | 160.4(2)    |
| C1-C2-C3-C4     | -179.71(8)  | -179.12(15) |
| Molecule 2      |             |             |
| O5-C21-C22-C23  | 40.76(17)   | 41.3(3)     |
| O4-C21-C22-C23  | -140.62(11) | -141.2(2)   |
| C21-C22-C23-C24 | -172.67(8)  | -174.25(15) |

**Table S3.** Temperature-dependent changes in hydrogen bond lengths in the structures of (*R*)-9-HSA crystallized from methanol, determined at 100 K and RT. Atom numbering refers to Figure 6a.

| Donor-H   | D-H       | H...A     | D...A     | D-H...A   | Acceptor | Symm. Code      |
|-----------|-----------|-----------|-----------|-----------|----------|-----------------|
| 100 K     |           |           |           |           |          |                 |
| O(2)-H(2) | 0.832(19) | 1.81(2)   | 2.637(3)  | 174(2)    | O(5)     | [-2+x, y, -1+z] |
| O(4)-H(4) | 0.96(2)*  | 1.71(2)   | 2.661(3)  | 167.6(19) | O(1)     | [2+x, y, 1+z]   |
| O(3)-H(3) | 0.860(18) | 1.924(19) | 2.753(3)* | 161.3(16) | O(6)     | [1+x, y, z]     |
| O(6)-H(6) | 0.802(19) | 1.957(19) | 2.743(3)* | 166.3(18) | O(3)     | -               |
| rT        |           |           |           |           |          |                 |
| O(2)-H(2) | 0.89(4)   | 1.76(4)   | 2.645(3)  | 171(4)    | O(5)     | -               |
| O(1)-H(4) | 1.26(4)*  | 1.43(4)   | 2.675(3)  | 169(4)    | O(4)     | -               |
| O(3)-H(3) | 0.77(3)   | 2.06(3)   | 2.795(2)* | 163(3)    | O(6)     | [3+x, y, 1+z]   |
| O(6)-H(6) | 0.85(3)   | 1.97(3)   | 2.791(2)* | 164(3)    | O(3)     | [-2+x, y, -1+z] |

\*distances most affected by temperature increase

### X-Rays Crystal Structure Parameters for (*R*)-12-Hydroxystearic Acid Methyl Ester [S1]

**Table S4.** Geometrical parameters of H-bonds in the structure of (*R*)-12-HSA methyl ester. The acceptor atom, marked with an asterisk, belongs to symmetry-related molecule.

| Donor-H   | D-H    | H...A  | D...A   | D-H...A | Acceptor |
|-----------|--------|--------|---------|---------|----------|
| O(3)-H(3) | 0.83 Å | 1.93 Å | 2.739 Å | 164°    | O(3)*    |

**Table S5.** Torsion angles (°) indicating the conformation of the carboxylic group with respect to the alkyl chain for (*R*)-12-HSA methyl ester.

|             | ( <i>R</i> )-12-HSA methyl ester |
|-------------|----------------------------------|
| O1-C1-C2-C3 | 8.3                              |
| O2-C1-C2-C3 | -177.2                           |
| C1-C2-C3-C4 | -177.1                           |

### References

[S1] Lundén, B.-M.; Löfgren, H.; Pascher, I. Accommodation of hydroxyl groups and their hydrogen bond system in a hydrocarbon matrix. *Chem. Phys. Lipids* **1977**, *20*, 263-271.
